## CORRECTION

# Correction: An essential role of CBL and CBL-B ubiquitin ligases in mammary stem cell maintenance (doi: 10.1242/dev.138164)

**Bhopal Mohapatra, Neha Zutshi, Wei An, Benjamin Goetz, Priyanka Arya, Timothy A. Bielecki, Insha Mushtaq, Matthew D. Storck, Jane L. Meza, Vimla Band and Hamid Band**

There was an error in Development (2018) **144**, dev138164 (doi: 10.1242/dev.138164).

One of the author names was spelled incorrectly. The online version has been corrected.

The authors apologise to readers for this mistake.
